# Supplementary material for: In vivo mutagenesis of miRNA gene families using a scalable multiplexed CRISPR/Cas9 nuclease system
Source: PubMed Central journal article supplement (PMC5004112; doi:10.1038/srep32386), 2016-08-30
Supplement: srep32386-s1.pdf [file srep32386-s1.pdf]

**Supplementary information:**

**In vivo mutagenesis of miRNA gene families using a scalable multiplexed CRISPR/Cas9 nuclease system**

Anand Narayanan, Guillermina Hill-Teran, Albertomaria Moro, Emma Ristori, Dionna M. Kasper, Christine Roden, Jun Lu, and Stefania Nicoli

| Name       | Chr location              | st | Gene type  | Mature ID    | Sequence (ClustalW2 alg)                 | Sequence (MEMEalg) |
|------------|---------------------------|----|------------|--------------|------------------------------------------|--------------------|
| miR-22a    | chr 15: 24261942-24262027 | -  | intergenic | MIMAT0031942 | AAGCUGCCAGCUGAAGAACUGU                   |                    |
| miR-25     | chr 14: 205362-205443     | -  | intron     | MIMAT0031946 | CAUUGCACUUGUCUCGGUCUGA                   |                    |
| miR-187-1  | chr 19: 35551006-35551094 | +  | intron     | MIMAT0001274 | UCGUGUCUUGUGUUCGACGC                     |                    |
| miR-128-1  | chr 22: 12504146-12504243 | +  | intron     | MIMAT0031967 | UCACAGUGAACCGGUCUCUUUU                   |                    |
| miR-128-2  | chr 19: 44518214-44518336 | +  | intron     | MIMAT0001824 | UCACAGUGAACCGGUCUCUUUU<br>*****          |                    |
| miR-99-1   | chr 15: 29144677-29144760 | +  | intron     | MIMAT0001812 | AACCCGUGAUCGGAUCUUGUG                    |                    |
| miR-99-2   | chr 10: 39438831-39438910 | -  | intergenic | MIMAT0001812 | AACCCGUGAUCGGAUCUUGUG<br>*****           |                    |
| miR-92a-1  | chr 1: 2806869-2806953    | +  | intergenic | MIMAT0031953 | AGGUUGGGAUUGGUAACAAUGCU                  |                    |
| miR-92a-2  | chr 9: 55420212-55420306  | -  | intergenic | MIMAT0031954 | AGGUUGGGAUCGGCCGCAAGCU<br>***** ** ***** |                    |
| miR-23a-1  | chr 22: 4997592-4997680   | +  | intergenic | MIMAT0001790 | AUCACAUUGCCAGGGAUUUCCA                   |                    |
| miR-23a-2  | chr 3: 13208734-13208831  | +  | intergenic | MIMAT0031944 | AUCACAUUGCCAGGGAUUUCCA                   |                    |
| miR-23a-3  | chr 2: 33618310-33618387  | +  | intergenic | MIMAT0031945 | AUCACAUUGCCAGGGAUUUCCA                   |                    |
| miR-23a-4  | chr 3: 13304718-13304815  | -  | intergenic | MIMAT0031944 | AUCACAUUGCCAGGGAUUUCCA<br>*****          |                    |
| miR-24-1   | chr 10: 15989409-15989488 | +  | exon       | MIMAT0001792 | UGGUCUAGUUCAGCAGGAACAG                   |                    |
| miR-24-2   | chr 3: 13215487-13215568  | +  | intergenic | MIMAT0001792 | UGGUCUAGUUCAGCAGGAACAG                   |                    |
| miR-24-3   | chr 8: 31010534-31010675  | +  | exon       | MIMAT0001792 | UGGUCUAGUUCAGCAGGAACAG                   |                    |
| miR-24-4   | chr 22: 5011864-5011953   | +  | intergenic | MIMAT0001792 | UGGUCUAGUUCAGCAGGAACAG                   |                    |
| miR-24-5   | chr 3: 13298295-13298376  | -  | intergenic | MIMAT0001792 | UGGUCUAGUUCAGCAGGAACAG<br>*****          |                    |
| miR-125a-1 | chr 16: 27137452-27137534 | +  | intergenic | MIMAT0001820 | UCCUGAGACCCUUAACCUUGG-                   |                    |
| miR-125a-2 | chr 19: 10066308-10066414 | +  | intergenic | MIMAT0001820 | UCCUGAGACCCUUAACCUUGG-                   |                    |
| miR-125b-1 | chr 15: 20409298-20409442 | +  | intergenic | MIMAT0001821 | UCCUGAGACCCUUAACCUUGGA                   |                    |
| miR-125b-2 | chr 5: 31637252-31637337  | +  | intergenic | MIMAT0001821 | UCCUGAGACCCUUAACCUUGGA                   |                    |
| miR-125b-3 | chr 10: 39415823-39415937 | -  | intergenic | MIMAT0001821 | UCCUGAGACCCUUAACCUUGGA                   |                    |
| miR-125c   | chr 15: 29150062-29150146 | +  | intron     | MIMAT0001822 | UCCUGAGACCCUUAACCUUGGA<br>***** ** *     |                    |
| let7a-1    | chr 11: 28380072-28380160 | -  | intergenic | MIMAT0001759 | UGAGGUAGUAGGUGUAUAUGU                    |                    |
| let7a-2    | chr 15: 20399518-20399601 | +  | intergenic | MIMAT0001759 | UGAGGUAGUAGGUGUAUAUGU                    |                    |
| let7a-3    | chr 4: 17722339-17722445  | -  | intergenic | MIMAT0001759 | UGAGGUAGUAGGUGUAUAUGU                    |                    |
| let7a-4    | chr 5: 31628942-31629034  | +  | intergenic | MIMAT0001759 | UGAGGUAGUAGGUGUAUAUGU                    |                    |
| let7a-5    | chr 23: 5478470-5478593   | -  | intergenic | MIMAT0001759 | UGAGGUAGUAGGUGUAUAUGU                    |                    |
| let7a-6    | chr 6: 54461616-54461744  | -  | intergenic | MIMAT0001759 | UGAGGUAGUAGGUGUAUAUGU                    |                    |
| let7b-1    | chr 4: 17721332-17721425  | -  | intergenic | MIMAT0001760 | UGAGGUAGUAGGUGUGUGGUU                    |                    |
| let7c-1    | chr 15: 29144917-29145023 | +  | intron     | MIMAT0001761 | UGAGGUAGUAGGUGUAUGGUU                    |                    |
| let7c-2    | chr 10: 39436596-39436687 | -  | intergenic | MIMAT0001761 | UGAGGUAGUAGGUGUAUGGUU                    |                    |
| let7d-1    | chr 16: 27120415-27120511 | +  | intergenic | MIMAT0001762 | UGAGGUAGUUGGUGUAUGGUU                    |                    |
| let7d-2    | chr 19: 10052393-10052480 | +  | intergenic | MIMAT0001762 | UGAGGUAGUUGGUGUAUGGUU                    |                    |
| let7e      | chr 23: 5478692-5478791   | -  | intergenic | MIMAT0001763 | UGAGGUAGUAGAUGAUAUGU                     |                    |
| let7f      | chr 11: 28379857-28379972 | -  | intergenic | MIMAT0001764 | UGAGGUAGUAGAUGAUAUGU                     |                    |
| let7g-1    | chr 23: 18553174-18553269 | -  | intergenic | MIMAT0001765 | UGAGGUAGUAGUUGUAUAUGU                    |                    |
| let7g-2    | chr 23: 28779253-28779349 | +  | intron     | MIMAT0001765 | UGAGGUAGUAGUUGUAUAUGU                    |                    |
| let7h      | chr 23: 28779557-28779670 | +  | intron     | MIMAT0001766 | UGAGGUAGUAGUUGUUGGUU                     |                    |
| let7i      | chr 25: 1688203-1688297   | -  | intergenic | MIMAT0001767 | UGAGGUAGUAGUUGUCUGU                      |                    |
| let7j      | chr 6: 41385655-41385737  | +  | intron     | MIMAT0003015 | UGAGGUAGUUGUUGUACAUGU<br>***** ** *      |                    |

## Supplementary Figure 1

Summary table for the zebrafish miRNA families/duplicates analyzed.

The miRNAs are grouped based on the sequence similarity of the mature miRNAs. For each family a sequence alignment was performed using ClustalW (Larkin, Blackshields et al. 2007) and MEME programs (Bailey, Boden et al. 2009). Identical sequences between miRNA family members are shown in red.

|             |                      | gRNA target sequence (X <sub>20</sub> ) |                          | Genotype                 |                            |
|-------------|----------------------|-----------------------------------------|--------------------------|--------------------------|----------------------------|
|             |                      | gRNA (1)                                | gRNA (2)                 | Primer-For 5'-3'         | Primer-Rev 5'-3'           |
| M2          | miR-22-a             | TGCCAGCTGAAGAAGCTGTTG                   | GACCTGCAGCAGTCTTCAC      | CAAAATTAAGGGTTGAGCTGACAA | ACAGAATATATCACTTCTCTGATCCC |
|             | miR-25               | TGCCAGCTGAAGAAGCTGTTG                   | GACCTGCAGCAGTCTTCAC      | CCGTGACGACTGTTGTGT       | CACCTTCAGCACTCTTCTTCT      |
|             | miR-187-1            | GTGTCTTGTGTTGCAGCCAG                    | GGGGTGC AACACAGGACAT     | CCTTACACTCCATCTGTGTCTC   | AACTTTGCTTTGCACCTTATCA     |
|             | miR-187-2            | GTGTCTTGTGTTGCAGCCAG                    | GGGGTGC AACACAGGACAT     | ACACTCCATCTGTGTCTTCTTC   | CCTCTCAGCAGAAGATAATGGG     |
| M4          | miR-128-1            | TAGGCTTTCTCACAGTGAAC                    | AGTGTGGGAGACGGGGCC       | CAGTTCTCTCACTCGACTCAAC   | GAGAGTCTCATAAACCCACAA      |
|             | miR-128-2            | CCACTCGTCTCACAGTGAAC                    | GTCTGTCACTAGTAGGACAG     | GTGCTTGTGAATGGCTGTATTT   | TCCACACTGAACCCATAAG        |
|             | miR-30-b             | TCAGCTGTGAGCTGCAGACG                    | TCAGACGAGGCTGGGCGGA      | GTCGTGAGTGTGTGTGGTAAA    | AGTCGTCTGTCTTTGAAATC       |
|             | miR-30-c             | AAACATCTACACTCTCAGC                     | GCTGGAGCCGAGCCGAGGCC     | ATGACCTGTATCATAGGCAGTTT  | GGTTGGAAGGACAGACAGATAG     |
|             | miR-30-d             | CGACTGGAAGCTGTGCTACG                    | GTTCTGTGCCTTGTATTAC      | CAGCAAACCCACCACATAGA     | GCCACACCTGTCAACTTTTA       |
|             | miR-92-a-1           | GCACCTTGC CCGCCTGTAA                    | CTTCTGCGCAGGTTGGGAT      | TGTGGCAGCACACTTCTTA      | ATTTGTGGGGTACAATCTC        |
|             | miR-92-a-2           | TGGAAGTATTGCACCTGTCC                    | GCATCCCTTCTTTGCAGGT      | AAGTGTACAACAGCAGAGAG     | GCTGAGATTTGTGGACGTATT      |
|             | miR-99-1             | CGATCTTGTGATAAGTTTGA                    | TCTATGGTCTCTGTCTCTG      | GTGAAGTTCATACGCTGATGA    | CTGTGGACAAGCTCTGAGCAA      |
|             | miR-99-2             | AACCCGTAGATCCGATCTTG                    | CAACCCAGCTCGATTCTGT      | GTTCTCTGTGCACCTGTTAATG   | GGCAATGTTTCTGTGGTCTATC     |
| M10         | miR-23-a-1           | ATCATAAAATCACATTGCCA                    | GATTCTGGCAGAGTGATTT      | GCTTTGACCTGGTTGGATAAG    | GGTGAGCAAGTACGATAACA       |
|             | miR-23-a-2           | CTGCCGGCCAGGGGAATTCC                    | ACATTGCCAGGGATTTCCAA     | GTGCTGTCCAACCTTATATTG    | AGACAGTCGGGATTCCTTTAG      |
|             | miR-23-a-4           | ATGACTGAATCACATTGCCA                    | ATGACTGAATCACATTGCCA     | GAGACAGTCGGCATTCTTTT     | TTCGGACAGATATAGCCGGTG      |
|             | miR-23-a-3           | ATCATAAAATCACATTGCCA                    | GATTCTGGCAGAGTGATTT      | GAGAAGCCAGGGTCATGAAA     | GACCCTTCATCCATCAGACTC      |
|             | miR-24-1             | CTCAGAAGGCACCGGAGCTC                    | TATCAGTTGTAGTAAATCAC     | AAGCCCATGACCAAGGTAAG     | AGCCCTCTGGTTCATTTAAG       |
|             | miR-24-2             | GTTTCAGCAGGAACAGGGGCC                   | ATTTACAGCACAGCAGGCCAC    | GTGCCCTCTTTTCTCTTCTT     | GTGAAGGTGAAGGCTCAG         |
|             | miR-24-3             | ATCAGCTCAGTAGGCACGGG                    | GTTTCAGCAGGAACAGGAGTC    | TTGACGGGCGGATTTTA        | TCCTCCATGAAGGGATTGTG       |
|             | miR-24-4             | CCAGTTTAGCAGGCACAAGT                    | TCAGTATGTTGATTAGTGC      | CTGGTGTGCATATAGGCTCTATG  | ATCTCGATGCCTTGACTTG        |
|             | miR-24-5             | GTTTCAGCAGGAACAGGGGCC                   | ATTTACAGCACAGCAGGCCAC    | TTCTCCCTCTGTCTGTGTCT     | GTGAAGCGTCCAGGTTTATA       |
|             | miR-125-a-1          | CCTGAGACCCCTTAACCTGTG                   | CAGGTGAGTCTCTCAGGAAC     | CCTGACAGTCTGAACGCATAG    | GATTGACGTTTGGGGATGAG       |
|             | miR-125-a-2          | GTGATGTCTCCAAGGTCAC                     | GACACAGACATACATCGATT     | CGAGCCAGAAGTGTGAGTTT     | TGTTGAGGACCAATGGTTTAG      |
|             | miR-125-b-1          | ACGTTTTCTGTTATGTGCA                     | TTAGGTTCTTGGGAGCTGAG     | GGTTGCACCTGTTGTGTCATAG   | GCCGCAATTTCTCAATCCC        |
|             | miR-125-b-2          | ACGTTTTCTGTTATGTGCA                     | GGGTTCTCGGGAGCTGTGAG     | GGCGTGTGTGTGTACTA        | AGTGTCTGACTCAGCTCTAA       |
| miR-125-b-3 | CAGGTTAAGCTCTTGGGACC | AAGTTAGGTTCTCAGGGACC                    | CATATCTCTCACAGACATCCATCC | CAACAAGACTCGACGGACA      |                            |
| M24         | let-7a-1             | GACGGTGGGATGAGGTAGT                     | TTTTAGGTCACACCCACAC      | ACTACCTCACACTGCACAAG     | TAAATCCTAACATGGCGGGC       |
|             | let-7a-2             | GC CCCAGGCTGAGGTAGT                     | ATAGTTTAGAATAACATCAC     | CTACTGATCAGGGCCTGTT      | CGAAATCAGTGTTCGCTCC        |
|             | let-7a-3             | ACTTACTGTCTTTCCGAAG                     |                          | TCAAGCATAAAACATTGCACACA  | AGGCAGGTGTTTCTCTGACA       |
|             | let-7a-4             | ATGTCTCGGGATGAGGTAGT                    |                          | GACACCTGCTAGTGTAGTG      | GGTGGAAACACTTGAATGCTC      |
|             | let-7a-5             | TCTGGACAAGGTGAGGTAGT                    |                          | GCAGTGTAAACAGCCACAT      | GACAGCCAAATCATCCGCAA       |
|             | let-7a-6             | TTTCTTCAAGGTGAGGTAGT                    |                          | AGCTGACACCTATGATGGTTT    | AAATGCCAAATGACCCAGCC       |
|             | let-7b               | TCGGACAGGGTGAGGTAGT                     |                          | TTTCCCTTTGCTTGTGAGGC     | TCTCTGCATACGCTCAGTTGA      |
|             | let-7c-1             | TGCATCCAGGCTGAGGTAGT                    | GAGTGTGTGCATCCAGGCTG     | TTTCCCTTTGCTTGTGAGGC     | CTCTGCATACGCTCAGTTGA       |
|             | let-7c-2             |                                         |                          | CCGGTGTGACCACTTTGTA      | CCTGTCTGCATCCACTTTAG       |
|             | Let-7d-1             | GCGTTGCGGTGTGAGGTAGT                    | GTGTGAGGTAGTTGGTTGTA     | CTAAGTCTCAGCAGTCTTTC     | CCCACGTATCTAATGTAACCTCTC   |
|             | Let-7-d-2            | CGCTGCAGGCTGAGGTAGT                     | GTTTTGCATCATAATCAGCC     | ACACCTGCTAGTGTAGTG       | GGTGGAAACACTTGAATGCTC      |
|             | let-7e               | ACAATCTACTGTCTTCCCTA                    |                          | CGCTTTGCTGTTGTTT         | CTCAAGCCATCTGTGAAGTCC      |
|             | let-7f               | GTAGTAGATTGTATAGTTGT                    |                          | GAGCGCTTCATATTATCCAGCA   | CAAGTACAGAGTTTCTCTCTGT     |
|             | let-7g-1             | AGGTAGTAGTTGTATAGTT                     | GTTTGGGATCACACCAGATC     | CCAAAAAGCCCTGTCTGTG      | CAGCTTCTACTGTGGGATT        |
|             | let-7g-2             | GTAGTAGTTGTATAGTTT                      | ACAGTCTACTGTCTTTCCCA     | AGGTGAGAGCACACTAAATG     | TGAGTAGTTGCTAGAAACAAT      |
|             | let-7h               | GAGGTAGTAGTTGTGCTGT                     |                          | ACATGGCTTGTCTTTATCCG     | GGCCTGTTCTCTTCTGACA        |
|             | let-7i               | GAGGTAGTAGTTGTGCTGT                     |                          | AGCGCAGTTTACAAAAGCTA     | GCTCAGGACTACTAGGACA        |
| let-7j      | TAGTGTTTGTACAGTTTTT  |                                         | AGTGTATGCATCCGTTTCTATGT  | GTACTGTATACCATGTGATGAGTG |                            |

**Supplementary Table 1.** Table reporting the sequences of all gRNAs used. Primers for the genotype of each miRNA locus are also included.
